# Supplementary material for: siRNA screening identifies METTL9 as a histidine Nπ-methyltransferase that targets the proinflammatory protein S100A9
Source: PubMed Central journal article supplement (PMC8571522; doi:10.1016/j.jbc.2021.101230), 2021-09-23
Supplement: mmc1.pdf [file mmc1.pdf]

# siRNA screening identifies METTL9 as a histidine $N^\pi$ -methyltransferase that targets the pro-inflammatory protein S100A9

Hiroaki Daitoku\*, Momoka Someya, Koichiro Kako, Takahiro Hayashi, Tatsuya Tajima, Hikari Haruki, Naoki Sekiguchi, Toru Uetake, Yuto Akimoto, Akiyoshi Fukamizu\*

\*Hiroaki Daitoku and Akiyoshi Fukamizu

Email: hiroakid@tara.tsukuba.ac.jp and akif@tara.tsukuba.ac.jp

**This PDF file includes:**

**Figures S1 to S6**

**Table S1**

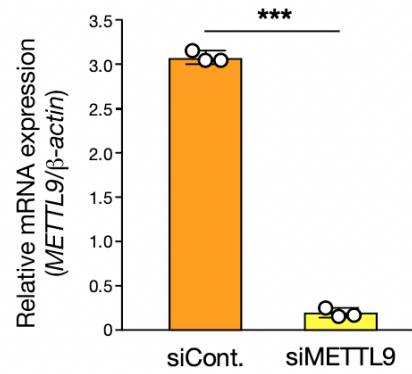

**Figure S1. siRNA knockdown of *METTL9* markedly reduces its mRNA.** HEK293T cells were transfected with either control or *Mettl9*-specific siRNAs. The mRNA levels of *Mettl9* were measured by qPCR analysis and normalized against the mRNA levels of  $\beta$ -actin. Mean  $\pm$  s.d. ( $n=3$  independent experiments). \*\*\* $P<0.001$ ; two-tailed Student's  $t$  test.

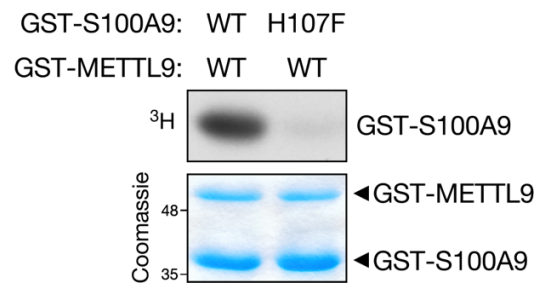

**Figure S2. METTL9 specifically methylates S100A9 at His-107 *in vitro*.** GST-S100A9 wild-type or H107F mutant was incubated with GST-METTL9 in the presence of <sup>3</sup>H-SAM. The incorporation of [<sup>3</sup>H]-methyl into proteins was visualized by autoradiography (*Top*). Coomassie blue staining of proteins used in the reaction is shown as a loading control (*Bottom*).

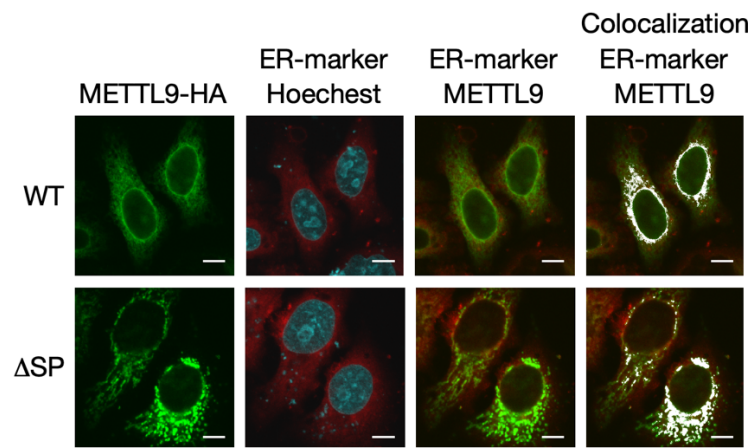

**Figure S3. METTL9 localizes to the ER in HeLa cells.** Representative immunofluorescence images of METTL9 wild-type (*Top*) or  $\Delta$ SP mutant (*Bottom*) localization in HeLa cells. Green, METTL9-HA; red, ER-marker (Alexa594-conjugated Concanavalin A); blue, nucleus (Hoechst33258); scale bar, 10  $\mu$ m. Images of ER-marker were merged with Hoechst and METTL9-HA staining. Colocalization indicates overlay of the ER-marker and METTL9-HA, shown as white pixels.

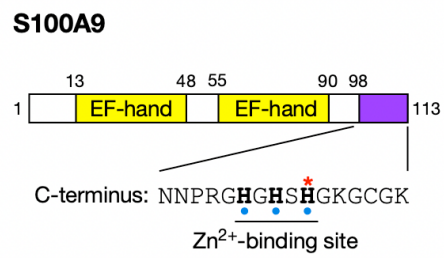

**Figure 4. A schematic model of mouse S100A9.**

*Top*, domain structure of S100A9 containing the two EF-hand (yellow) and a C-terminal Zn<sup>2+</sup>-binding site (purple). *Bottom*, the C-terminal sequence of mouse S100A9. Histidine residues involved in zinc coordination are marked with blue spheres, and methylated histidine at 107 is indicated with a red asterisk.

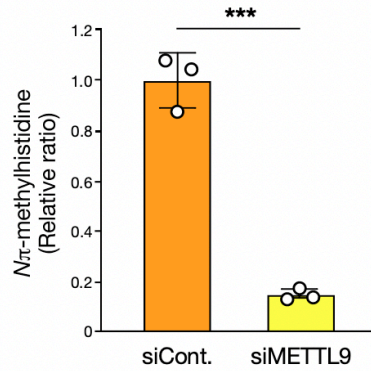

**Figure S5. siRNA knockdown of *METTL9* reduces N $\pi$ -methylhistidine levels of Flag-S100A9.** HEK293T cells transfected with control or *METTL9* siRNAs were further transfected with Flag-S100A9 expression plasmid, followed by immunopurification and acid hydrolysis. Their methylhistidine contents were determined by LC-MS/MS and shown as a relative ratio compared to control siRNA knockdown. Mean  $\pm$  s.d. ( $n=3$  independent experiments).

\*\*\* $P < 0.001$ ; two-tailed Student's  $t$  test.

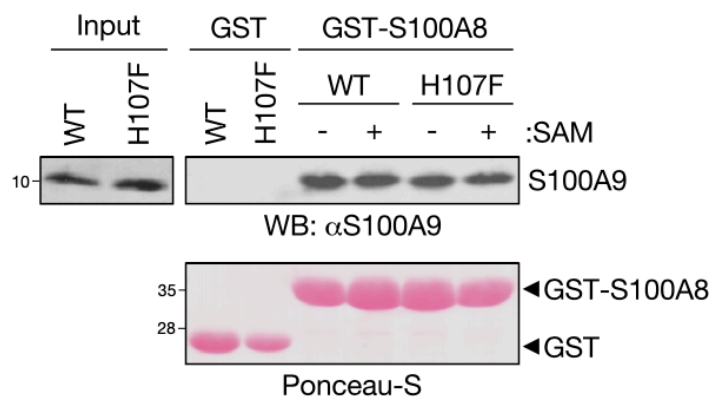

**Figure S6. METTL9-mediated methylation of S100A9 has no effect on its heterodimer formation with S100A8.**

Recombinant S100A9 wild-type and H107F proteins were methylated by GST-METTL9 in the absence or presence of SAM and then subjected to GST pull-down assay with GST alone or GST-fused S100A8, followed by Western blotting using an anti-S100A9 antibody (*Top*). The input indicates 5% of whole-cell lysates used for the GST pull-down assay. Ponceau-S staining of GST proteins used in the reaction is shown as a loading control (*Bottom*).

**Supplementary Table S1:** The sequences of siRNA pools used in the screening.

| Gene Symbol           | Gene Accession | Sequence             |
|-----------------------|----------------|----------------------|
| Non-targeting Control |                | UGGUUUACAUGUCGACUAA  |
|                       |                | UGGUUUACAUGUUGUGUGA  |
|                       |                | UGGUUUACAUGUUUCUGA   |
|                       |                | UGGUUUACAUGUUUCCUA   |
| METTL18               | NM_033418      | GAUUAAACAGUAUGGUGA   |
|                       |                | GCAUGUUAAAGUUUACAGUA |
|                       |                | GAUCACUUGUGGGAACAUA  |
|                       |                | GUUUUAGAGGGAGGCUUAA  |
| METTL20               | NM_001135864   | CGCUGAAGGAAUUGAUUA   |
|                       |                | CUAUJAGAACUCGAGUACUG |
|                       |                | GAGGACAACUGUGAUGUAA  |
|                       |                | CCUUGUUGUUCUUGGCGAU  |
| METTL21A              | NM_145280      | AGUGUGAGAUUUCGAUUUA  |
|                       |                | UGACUAUCACGGAUCGAAA  |
|                       |                | AUGAGGAGACCACGGAAUU  |
|                       |                | CCUGAAAUCUGGCCGGAUG  |
| METTL21B              | NM_015433      | GUGCAAUUUUUCGAGAGU   |
|                       |                | GAGCCUUGAUCACGGAAACA |
|                       |                | GGCAAGAAGGUGAUCGAAC  |
|                       |                | CUUCAGUCCAUUCCGAAA   |
| METTL21C              | NM_001010977   | GGGCAAACAAUUCAGGUU   |
|                       |                | GCUAUGGCCUUGUGUCAAU  |
|                       |                | ACUUGAAAUUGGUGCCGGA  |
|                       |                | GGAUUGAGAAGGUAGUGCA  |
| METTL21D              | NM_001040662   | GCUCUAACAACCCUGGGUAA |
|                       |                | UGGUACAGUGCUACGACUA  |
|                       |                | CUAAAAGAUUACAGCGGAU  |
|                       |                | CAGCUUAGGUUACUUGAUU  |
| METTL22               | NM_024109      | CAUGUGAAGCCUACGAUCA  |
|                       |                | CAAGGCAGCCCGCACGAUA  |
|                       |                | UAGCACAGGAAGAAGACGA  |
|                       |                | CCGAAGUGUUUACGACGA   |
| METTL23               | NM_001080510   | AAGGACAGUCUCUGAAUUA  |
|                       |                | GGACUAACAUGGGGUCAUA  |
|                       |                | UUGAGAAUGCAGUGGGUCU  |
|                       |                | UCACCUAGACAACACUUA   |
| METTL25               | NM_032230      | GGGAGGAGCUGGUCGACUU  |
|                       |                | UGACUUGGGUUCGGUAAA   |
|                       |                | AUAUUGAACUACUACGAGA  |
|                       |                | GUUGUUUGAUCCCGUGAAA  |
| CAMKMT                | NM_024766      | GCAUAAUAGUGGAUCCUUG  |
|                       |                | CCGGACAUAUUGAAGAAA   |
|                       |                | CGCCGAGGGAUACUUUAA   |
|                       |                | GGUGCAUGGGUCCAAUUA   |

| Gene Symbol | Gene Accession | Sequence             |
|-------------|----------------|----------------------|
| EEF2KMT     | NM_201598      | GAAAUCAAGGCCAACCAAA  |
|             |                | GCCUCUACGUGCUGCCCAU  |
|             |                | GCACGGCCAUCUCCCUA    |
|             |                | GUGCUGCUCGAAAGGGUUU  |
| FAM86B1     | NM_001083537   | AAUCAAACUGCCUCUAA    |
|             |                | GAGCAGAGCUUACUCUAAU  |
|             |                | UGGAAUGUUUGGAGAUUUA  |
|             |                | CAUGAAGAACAAGAGACAG  |
| FAM86B2     | XM_928336      | GGGCAUACAUCUUCAGCGA  |
|             |                | CAUUAGAGGCAGACAUAC   |
|             |                | CCGGCAGCCUUCAUUAACA  |
|             |                | GCCAUCAUCUCCACGGUA   |
| FAM86C1     | NM_152563      | GAGACCAAUUGCAGGGUAA  |
|             |                | CUAAUAAGACAUCGGCUAU  |
|             |                | GAGCAGAGCUUACUUCUAAU |
|             |                | ACUGGAAUGUUUGGAGAAU  |
| CARNMT1     | NM_152420      | UCUUGUUUGUGGUCGGUAA  |
|             |                | CUAAGAAAACUAGCGUAA   |
|             |                | AGGAGAGCCUUGAGCGUGA  |
|             |                | UAGCAUCACAGGCCGGUAA  |
| HNMT        | NM_001024074   | CGGAAAUAUGUUGAAUCU   |
|             |                | CCACGGAACACCAGUGCAU  |
|             |                | CAUCUUCUAGAGGAGCUU   |
|             |                | AGGAAUUAUGGACAAGAA   |
| METTL6      | NM_152396      | UAGAAGAAGAUCCGAAUUA  |
|             |                | AGAAGUGGUAAACGAGUUA  |
|             |                | UCCAAGAGCCAUGAAUUA   |
|             |                | GGAUUGUUUAUGUUGAUA   |
| METTL9      | NM_016025      | AUAAACACGUGGAGGUCGA  |
|             |                | UGGUUAUAAAGCCGAAUUA  |
|             |                | GUGAAGGCAGCAUGAUUAA  |
|             |                | AGAGUUGGGUUUUGUGAUU  |
| SETD3       | NM_199123      | GGUAAGAGAGUCGAGUAA   |
|             |                | GCUAAUGACUGUUGAAUCU  |
|             |                | GCACUGGCCUUCUUAUUGC  |
|             |                | ACACUCCUCUCUACUUGA   |
| SETD4       | NM_001007259   | GUUACGGCCUCACGAUAA   |
|             |                | GAAACUACUUCUACGAAA   |
|             |                | CCAGGUAAGCAGCGUUU    |
|             |                | GAGCCCAGGUCAGGAGUU   |
| SMYD1       | NM_198274      | GUGAUUACUGCAACGGUU   |
|             |                | AAGAAUGAAUUGUCGGCCA  |
|             |                | GUUAUCAGAGGUUGUGAAA  |
|             |                | GCCCAACUGUACUGUCAUA  |
